# Supplementary material
Source: Springer Nature journal article supplement (https://www.springermedizin.de/resource/supplementary/12885_2014_4999_MOESM3_ESM.pdf/9467916)

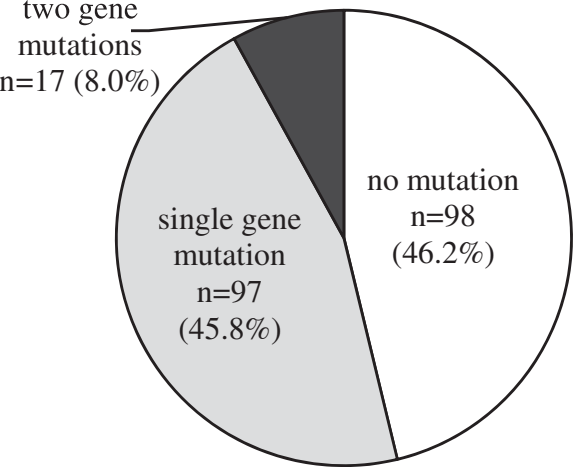

two gene  
mutations  
n=17 (8.0%)

single gene  
mutation  
n=97  
(45.8%)

no mutation  
n=98  
(46.2%)

Supplement: MOESM3 [file 9467916]
